1           **Association of Workload and Practice of Respectful Maternity Care**  
2           **Among the Healthcare Providers, Before and During the COVID-19**  
3           **Pandemic in South Western Nepal: A Cross-Sectional Study**

4  
5   Alpha Pokharel<sup>1\*</sup>†, Junko Kiriya<sup>2</sup>†, Akira Shibanuma<sup>2</sup>†, Ram Silwal<sup>1,2</sup>†, Masamine

6   Jimba<sup>2</sup>†

7  
8   <sup>1</sup>Green Tara Nepal, Kathmandu, Nepal

9  
10   <sup>2</sup>Department of Community and Global Health, Graduate School of Medicine, The  
11   University of Tokyo, Tokyo, Japan

12  
13  
14   \*Corresponding author

15   E-mail: [alphapokharel@gmail.com](mailto:alphapokharel@gmail.com)

16   †These authors contributed equally to this work

## 24 Abstract

25

26 **Introduction:** Respectful maternity care is an approach that involves respecting  
27 women's belief, choices, emotions, and dignity during the childbirth process. As the  
28 workload among maternity care workforce affects intrapartum quality care, respectful  
29 maternity care might have also been affected, particularly during the pandemic. Thus,  
30 this study was conducted to examine the association between workload among  
31 healthcare providers and their practice of respectful maternity care, before and during  
32 the pandemic.

33

34 **Methods:** A cross-sectional study was conducted in South Western Nepal. A total of  
35 267 healthcare providers from 78 birthing centers were included. Data collection was  
36 done through telephone interviews. The exposure variable was workload among the  
37 healthcare providers, and the outcome variable was respectful maternity care practice  
38 before and during the COVID-19 pandemic. Multilevel mixed-effect linear regression  
39 was used to examine the association.

40

41 **Results:** The median client-provider ratio before and during the pandemic was 21.7  
42 and 13.0, respectively. The mean score of respectful maternity care practice was 44.5  
43 (SD 3.8) before the pandemic, which was decreased to 43.6 (SD 4.5) during the  
44 pandemic. Client-provider ratio was negatively associated with respectful maternity  
45 care practice for both times; before (Coef. -5.16; 95% CI -8.41 to -1.91) and during  
46 (Coef. -7.47; 95% CI -12.72 to -2.23) the pandemic.

47

48 **Conclusions:** While a higher client-provider was associated with a lower respectful  
49 maternity care practice score both before and during the COVID-19 pandemic, the  
50 coefficient was larger during the pandemic. Therefore, workload among the healthcare  
51 providers should be considered before the implementation of respectful maternity  
52 care, and more attention should be given during the pandemic.

53

54

55

## 56 **Introduction**

57

58 Respectful maternity care is an approach based on the principle of ethics and the  
59 fundamental rights of women. It includes respecting women's beliefs, independence,  
60 choices, emotions, and dignity while providing maternity care (1). Implementing it in  
61 birthing centers reduces unnecessary medical interventions such as episiotomy and  
62 fundal pressure. It also improves women's satisfaction with care and decreases  
63 obstetric violence (2). Whereas, disrespectful treatment or negligence during childbirth  
64 endangers both mothers' and newborns' health and decreases women's future use of  
65 health facilities (2). A large number of women experience disrespect and abuse during  
66 childbirth, with the global prevalence varying between 15% and 98% (3). Some  
67 common forms of disrespectful maternity care prevalent worldwide are physical  
68 abuse, verbal abuse, refusal to provide pain relief, abandonment, poor  
69 communication, and lack of privacy (4). As a response to personal safety and security  
70 during the COVID-19 pandemic, some of the respectful maternity care practices  
71 deteriorated more than before. Restriction of labor companion and breastfeeding  
72 were increased during the COVID-19 pandemic (5,6).

73 An adequate supply of health human resources is essential to delivering  
74 respectful maternity care (7). In a qualitative study, healthcare providers reported

75 insufficient staff members, high client loads, and inadequate facilities as hindering  
76 factors for better maternity care practice (8). Workload among healthcare providers  
77 has caused insufficient and unnecessary client care (2,9). A higher workload among  
78 healthcare providers at the birthing centers has decreased interpersonal  
79 communication with the clients (10). Increased institutional delivery, but the  
80 unreplenished shortage of health human resources has burdened the healthcare  
81 providers (11). The inclusion of tasks other than the clinical aspect, such as  
82 administrative, monthly reporting, and field works, has further increased their  
83 workload (12). Consequently, the tasks that do not directly affect the health of women  
84 and newborns are often ignored (2,9). The increased workload has also called upon  
85 many malpractices in Low-and Middle-income Countries(LMICs) such as unnecessary  
86 use of episiotomy and fundal pressure (10). Moreover, increased workload among  
87 healthcare providers has negatively affected the quality of care they provide (13).

88 Nepal has made substantial progress in improving maternal health care access  
89 and utilization (14). Despite this, progress is still required to reach universal access to  
90 sexual and reproductive health services by 2030. Along with socio-demographic  
91 factors, the low quality of care is also a significant barrier to maternal health care  
92 access and utilization in Nepal (15,16). As Nepalese women bypass the primary  
93 healthcare centers to have child delivery at the tertiary centers, these centers are

94 overburdened with the clients (17,18). These tertiary health centers were more  
95 burdened with clients during the COVID-19 pandemic. The increased work burden  
96 during the pandemic further deteriorated the maternal healthcare quality (19).

97         Respectful maternity care should be understood from both providers' and  
98 mothers' sides as it is crucial for its effective implementation (20). However, most  
99 studies have focused on the mothers' side, and research on the providers' side is still  
100 lacking (3,8). Since healthcare providers' scarcity was negatively associated with the  
101 quality of skilled birth care (21), it becomes crucial to know if workload among  
102 healthcare providers affects the respectful maternity care practice. It is also important  
103 to assess the influence of the COVID-19 pandemic on respectful maternity care  
104 practice, since the COVID-19 pandemic has further burned the workload among the  
105 healthcare providers and negatively affected maternity care (19). Thus, this study was  
106 conducted to examine the association of workload among healthcare providers and  
107 their respectful maternity care practice, both before and during the COVID-19  
108 pandemic.

109

## 110 **Methods**

111

## 112 **Study design and settings**

113 A cross-sectional study was conducted in the South Western Nepal. The study area  
114 included four districts: Rupandehi, Kapilvastu, Nawalparasi (Bardaghat Susta West),  
115 and Nawalparasi (Bardaghat Susta East). All the government-run birthing centers  
116 within the study area were included in the study.

117

## 118 **Participants**

119 All the eligible healthcare providers had a total birthing center experience of more  
120 than two years and were working at the present birthing center for more than three  
121 months. The duration of work experience was considered to ensure familiarization  
122 with the context and work culture (22).

123

## 124 **Variables**

### 125 **Exposure variable**

126 The exposure variable was the workload among the healthcare providers. Both  
127 subjective and objective measures of workload were assessed. The subjective  
128 workload was assessed at individual provider level with the National Aeronautics and  
129 Space Administration Task Load Index (NASA TXL) scale (24). It is a scale with a six-item  
130 questionnaire that measures the level of mental demand, physical demand, temporal

131 demand, performance, effort, and frustration for the current work (23,24). It consists  
132 of a two-part evaluation process: weights and ratings, and its total score range from 0  
133 to 100. A higher score represents a higher workload (24,25).

134         The objective workload was assessed by the client-provider ratio (26), and the  
135 total number of deliveries at the health facility level (10). For the number of deliveries,  
136 the healthcare providers were asked to recall the approximate total number of  
137 deliveries attained in previous month of data collection. The client-provider ratio was  
138 assessed at health facility level and was calculated by dividing the total number of  
139 births in the health facility by the total number of healthcare providers during that  
140 period.

141         In Nepal, restrictive measures taken against COVID-19 influenced the client-  
142 provider ratio, as the number of institutional births decreased in Nepal (19). To avoid  
143 the influence, the client-provider ratio was calculated in two time periods: six months  
144 before and after the COVID-19 pandemic declaration by WHO on March 11, 2020 (27).  
145 Converting the Nepalese calendar to the Gregorian calendar, the two periods for  
146 calculating the client-provider ratio were: July/August 2019 to January/February 2020  
147 (before COVID-19 pandemic declaration) and February/March 2020 to June/July 2020  
148 (after COVID-19 pandemic declaration) (28). To better interpret the client-provider

149 ratio in the regression analysis, the client-provider ratio of six months was converted  
150 to per day.

### 151 **Outcome variable**

152 The outcome variable in this study was healthcare providers' practice of respectful  
153 maternity care. It was assessed using a questionnaire adapted from the performance  
154 standard for respected maternity care prepared by the Maternal and Child Health  
155 Integrated Program (29). The questionnaire is comprised of 7 domain and 27 items:  
156 non-abusive care (6 items), consented care (9 items), confidential care (3 items),  
157 dignified care (3 items), non-discriminative care (2 items), non-abandonment care (3  
158 items), and non-detention care (1 item) (29). As all the included birthing centers  
159 provided free maternity service to the clients, the non-detention domain (detention in  
160 a health facility due to inability to pay hospital bills) was removed from the  
161 questionnaire (30). Each item has three responses: always (2 points), sometimes (1  
162 point), and never (0 point). The scores of all items were summed to compute the total  
163 score. The possible score ranges from 0 to 52, and a higher score represents the better  
164 practice of respectful maternity care.

165 The maternity care practice was also affected by the COVID-19 in Nepal (19). To  
166 incorporate the issue, the healthcare providers were asked to report the practice of  
167 each item of respectful maternity care before (July/August 2019 to January/February



168 2020) and during the COVID-19 pandemic (February/March 2020 to June/July 2020)

169 (28).

## 170 **Confounders and covariates**

171 Potential confounders and covariates were added to the study. Healthcare providers'

172 job positions (7,31) and education level (10,32) were included as confounders.

173 Awareness of respectful maternity care, SBA training, age, being tested positive for

174 COVID-19, and years of job experience were included as covariates (10). Healthcare

175 providers were considered to be aware of respectful maternity care if they had ever

176 heard or read about it in the past.

177

## 178 **Validity and reliability of the scale**

179 Permission was obtained from the concerned organization for the use of the

180 questionnaires. As the questionnaires were not available in the Nepali language, they

181 were checked for cultural adaptation through translation and back translation to the

182 Nepali language and pre-testing of scale among the healthcare providers (33). The

183 respectful maternity care practice questionnaire was not tested for validity and

184 reliability among healthcare providers, and was used in Nepal before. Thus, content

185 validity was ensured through three experts opinion, two online Focus Group

186 Discussions (FGDs) among the healthcare providers, and the pre-test of the

187 questionnaires among the healthcare providers. Cronbach's alpha was calculated to  
188 measure the internal consistency of respectful maternity care practice questionnaire  
189 (33). As a whole (26 item), the score was 0.93. Each of the six domains of respectful  
190 maternity care scored above 0.80.

191

## 192 **Data collection**

193 Data were collected from September to October 2020. Data were collected through  
194 telephone using interviewer-administered questionnaire and response was  
195 simultaneously entered into Google forms. The healthcare providers were contacted  
196 beforehand for verbal consent and data collection schedule. The research assistants  
197 were hired, and trained to obtain verbal consent and to conduct telephone-based  
198 interviews. It took approximately 25 minutes to explain the study and interview the  
199 healthcare providers. The data for the client-provider ratio were obtained from the  
200 records of the health authority.

201

## 202 **Data analysis**

203 Descriptive statistics was performed to present the background characteristics of  
204 health facilities and healthcare providers, and practice of respectful maternity care  
205 among the healthcare providers. A paired t-test was performed to compare the

206 practice of respectful maternity care before and during the COVID-19 pandemic. A  
207 two-level, mixed-effect linear regression analysis was performed with a random  
208 intercept at the health facility level. Two null and full models were used for the sub-  
209 category of the outcome variable: respectful maternity care practice before and during  
210 the COVID-19 pandemic. The intraclass correlation coefficient was used to compare  
211 the proportion of variance caused by the random intercept at the health facility level.  
212 The significance level was set at 0.05. Google sheet was used for data organization and  
213 filtering. Data were exported to R Studio version 1.2.5001 for statistical analyses.

214

## 215 **Research ethics**

216 An ethics approval was obtained from the Research Ethics Committee, Graduate  
217 School of Medicine, the University of Tokyo, Japan (serial number: 2020101NI), and  
218 Nepal Health Research Council, Nepal (ERB protocol registration number: 524/2020  
219 MT). Permission for data collection was obtained from District Health Offices, district  
220 hospitals, and city hospitals. Permission to use healthcare providers' phone numbers  
221 was obtained from them through the head of health facilities. Participation in this  
222 study was voluntary. Confidentiality was assured, and verbal consent was taken from  
223 each healthcare provider. Documentation of the date and time of consent was done.  
224 The audio recording of the telephone interview and the verbal consent were not done.

## 225 Results

226

### 227 Characteristics of health facility

228 Out of 79 birthing centers, one province hospital was excluded from the study due to  
229 administrative issues. As a result, 78 were included in the study. Kapilvastu district had  
230 the highest number of health facilities (n=28), and the Parasi district had the least  
231 (n=13). About three-quarters of the health facilities were health posts (Table 1).

232

233 **Table 1. Characteristics of health facilities (n= 78)**

| Level of Health Facility | Districts  |           |           |           | Total     |
|--------------------------|------------|-----------|-----------|-----------|-----------|
|                          | Kapilvastu | Rupandehi | Nawalpur  | Parasi    |           |
| Health Post              | 23         | 16        | 10        | 8         | 57        |
| PHC <sup>a</sup>         | 2          | 5         | 4         | 2         | 13        |
| City Hospital            | 2          | 0         | 0         | 2         | 4         |
| District Hospital        | 1          | 1         | 1         | 1         | 4         |
| <b>Total</b>             | <b>28</b>  | <b>22</b> | <b>15</b> | <b>13</b> | <b>78</b> |

234 <sup>a</sup>PHC: Primary Health Care Center

### 235 Background characteristics of the healthcare providers

236 A total of 318 healthcare providers were working at the 78 birthing centers. Among  
237 them, 267 healthcare providers completed the interview and were included in data

238 analyses. The least number of healthcare provider recruited from a health facility was  
 239 one, whereas the highest was 11. There were no missing data. Table 2 presents the  
 240 summary of their background characteristics. The majority of the healthcare providers  
 241 had undergone Auxiliary Nurse Midwife (ANM) education (70.4%), and SBA training  
 242 (73.4%), worked as an ANM (88.4%), and worked at a health post (63.3%). About 80%  
 243 of the healthcare providers had never heard of or read about respectful maternity care  
 244 in the past, and around 7.0% of them had been tested positive for COVID-19.

245

246 **Table 2. Background characteristics of the healthcare providers (n=267)**

| Characteristics                       | n (%)      | Mean (SD)  |
|---------------------------------------|------------|------------|
| <b>Age (years)</b>                    |            | 30.9 (7.7) |
| <b>Education</b>                      |            |            |
| Auxiliary Nurse Midwife               | 188 (70.4) |            |
| Proficiency Certificate Level Nursing | 64 (24.0)  |            |
| Bachelor of Nursing                   | 15 (5.6)   |            |
| <b>Occupation</b>                     |            |            |
| Auxiliary Nurse Midwife               | 236 (88.4) |            |
| Staff Nurse                           | 30 (11.2)  |            |
| Nursing Officer                       | 1 (0.4)    |            |
| <b>Total work experience (years)</b>  |            | 8.3 (6.8)  |

|                                                          |            |           |
|----------------------------------------------------------|------------|-----------|
| <b>Experience at the present birthing center (years)</b> |            | 3.5 (4.2) |
| <b>SBA training</b>                                      |            |           |
| Yes                                                      | 196 (73.4) |           |
| No                                                       | 71 (26.6)  |           |
| <b>Ever heard/read about respectful maternity care</b>   |            |           |
| Yes                                                      | 48 (18.0)  |           |
| No                                                       | 219 (82.0) |           |
| <b>COVID-19 test (PCR test) in past</b>                  |            |           |
| Positive                                                 | 18 (6.7)   |           |
| Negative                                                 | 249 (93.3) |           |
| <b>District</b>                                          |            |           |
| Kapilvastu                                               | 83 (31.1)  |           |
| Rupandehi                                                | 71 (26.6)  |           |
| Nawalpur                                                 | 56 (21.0)  |           |
| Parasi                                                   | 57 (21.3)  |           |
| <b>Level of health facility</b>                          |            |           |
| Health Post                                              | 169 (63.3) |           |
| Primary Health Care Center                               | 44 (16.5)  |           |
| City Hospital                                            | 20 (7.5)   |           |
| District Hospital                                        | 34 (12.7)  |           |

247

248 **Workload among the healthcare providers**

249 The healthcare providers' mean total subjective workload score was 77.7 (range: 30-  
 250 100). The median client-provider ratio of six months before and during the COVID-19  
 251 pandemic was 21.7 (IQR 9.7 to 52.2) and 13.0 (IQR 6.2 to 28.4). The mean number of  
 252 deliveries attended by a healthcare provider in the last month was 13.6 (SD 19.6)  
 253 (Table 3).

254

255 **Table 3. Characteristics of workload among healthcare providers**

| Characteristics                                                         | Mean (SD)   | Median (1Q-3Q)   | Range     |
|-------------------------------------------------------------------------|-------------|------------------|-----------|
| Client-provider ratio of 6 months, before the COVID-19 pandemic (n=263) | 34.9 (34.7) | 21.7 (9.7-52.2)  | 0.3-189.0 |
| Client-provider ratio of 6 months, during the COVID-19 pandemic (n=263) | 22.9 (24.0) | 13.0 (6.2-28.4)  | 1.2-144.0 |
| Number of deliveries attended in last month (n=267)                     | 13.6 (19.6) | 9.0 (4.0-15.0)   | 0.0-150.0 |
| A score of subjective workload [NASA TXL Scale] (n=267)                 | 77.7 (13.2) | 78.3 (70.0-87.8) | 30-100    |

256

## 257 **Respectful maternity care practice**

258 During the COVID-19 pandemic, mean total score of respectful maternity care  
 259 decreased to 43.6 (SD 4.5) from 44.5 (SD 3.8). Table 4 presents the score of practices  
 260 under each domain of respectful maternity care. For the abuse-free care domain, all  
 261 healthcare providers never restrained the women during labor. However, 27.3% of

262 them sometimes had to physically or verbally abuse the women. Also, 59% of them  
263 always provided pain and comfort relief to the women in labor. The practice of always  
264 touching the women in a culturally appropriate way was 95.1 % before the COVID-19  
265 pandemic and 89.5% during the pandemic. All healthcare providers never separated  
266 the baby with the mother, both before and during the pandemic.

267           Regarding the right to information and informed choice care domain, the  
268 practice of always allowing a labor companion was 62.5% before the pandemic, and  
269 49.0% during the pandemic. Statistically significant differences in practices for two  
270 time points were noticed for: always allowing labor companion, always introducing self  
271 to the women and her companion (before and during the pandemic: 34.8% and  
272 32.5%), always encouraging women to ask questions (before and during the pandemic:  
273 91.0% and 85.0%), respond the questions promptly (before and during the pandemic:  
274 92.8% and 86.1%), explain the procedures (before and during the pandemic: 90.6% and  
275 84.0%), and provide periodic updates during the COVID-19 pandemic (before and  
276 during the pandemic: 93.2% and 85.7%). Allowing women to choose the birth position  
277 was never practiced by approximately half of the healthcare providers, both before  
278 and during the pandemic.

279           For the confidential care domain, about one-third of the healthcare providers  
280 never stored women's files in the locked cabinet, both before and during the



281 pandemic. Around half of the healthcare providers sometimes or never used curtains  
282 for procedures, both before and during the pandemic.

283 For non-abandon care domain, 96.4% of the healthcare providers always  
284 encouraged the women to call before the COVID-19 pandemic, but it was 92.5% during  
285 the pandemic. When called, 67.7% of the healthcare providers always came quickly  
286 before the pandemic, but 64.8% came during the pandemic. While the practice of  
287 never always leaving the women alone during labor was 56.7% before the pandemic, it  
288 was 54.0% during the pandemic.

289

290 **Table 4. Item score of respectful maternity care practice (n=267)**

| Questions                                                 | Before COVID-19 pandemic |               |           | During COVID-19pandemic |               |           | p-value |
|-----------------------------------------------------------|--------------------------|---------------|-----------|-------------------------|---------------|-----------|---------|
|                                                           | Always (%)               | Sometimes (%) | Never (%) | Always (%)              | Sometimes (%) | Never (%) |         |
| <b>Abuse-free care</b>                                    |                          |               |           |                         |               |           |         |
| Never physically or verbally abused                       | 72.2                     | 27.3          | 0.0       | 72.0                    | 28.0          | 0.0       | 0.318   |
| Never restrained physically                               | 100.0                    | 0.0           | 0.0       | 100.0                   | 0.0           | 0.0       | 0.318   |
| Touched in a culturally appropriate way                   | 95.1                     | 4.9           | 0.0       | 89.5                    | 10.5          | 0.0       | <0.001  |
| Never separated the baby from mother <sup>a</sup>         | 98.5                     | 1.5           | 0.0       | 96.2                    | 3.8           | 0.0       | 0.057   |
| Never denied food and fluids <sup>a</sup>                 | 97.0                     | 3.0           | 0.0       | 97.0                    | 3.0           | 0.0       | 1.000   |
| Provided comfort/pain relief                              | 58.8                     | 23.9          | 17.2      | 59.1                    | 17.0          | 23.9      | 0.318   |
| <b>Right to information, informed consent, and choice</b> |                          |               |           |                         |               |           |         |

|                                                |      |      |      |      |      |      |        |
|------------------------------------------------|------|------|------|------|------|------|--------|
| Introduced self to women and her companion     | 34.8 | 54.6 | 10.4 | 32.5 | 52.3 | 15.2 | <0.001 |
| Encouraged companion to stay with women        | 62.5 | 24.7 | 12.8 | 49.0 | 23.5 | 27.5 | <0.001 |
| Encouraged to ask questions                    | 91.0 | 9.0  | 0.0  | 85.0 | 14.2 | 0.8  | <0.001 |
| Responded questions promptly and politely      | 92.8 | 7.2  | 0.0  | 86.1 | 13.9 | 0.0  | <0.001 |
| Explained the procedure                        | 90.6 | 9.0  | 0.4  | 84.0 | 14.2 | 1.8  | <0.001 |
| Provided periodic update                       | 93.2 | 6.8  | 0.0  | 85.7 | 12.7 | 1.6  | <0.001 |
| Allowed to move during labor                   | 53.5 | 42.6 | 3.7  | 54.0 | 42.3 | 3.7  | 0.318  |
| Allowed to assume the birth position of choice | 19.1 | 32.9 | 48.0 | 19.4 | 32.2 | 48.4 | 0.990  |
| Obtained consent before the procedure          | 91.7 | 7.4  | 0.7  | 91.3 | 8.0  | 0.7  | 0.318  |
| <b>Confidential care</b>                       |      |      |      |      |      |      |        |
| Stored file in locked cabinets                 | 19.1 | 47.9 | 33.0 | 19.0 | 47.7 | 33.3 | 0.157  |
| Used curtain or visual barrier                 | 56.6 | 34.8 | 8.6  | 56.2 | 38.0 | 7.8  | 0.655  |
| Used drapes and covering                       | 70.7 | 26.5 | 2.6  | 71.1 | 26.3 | 2.6  | 0.564  |
| <b>Dignified care</b>                          |      |      |      |      |      |      |        |
| Spoke politely to women                        | 94.0 | 5.6  | 0.4  | 93.0 | 6.6  | 0.4  | 0.083  |
| Allowed non-harmful cultural practice          | 95.8 | 4.2  | 0.0  | 95.5 | 4.5  | 0.0  | 0.318  |
| Never insulted and intimidated                 | 94.3 | 5.7  | 0.0  | 94.3 | 5.7  | 0.0  | 1.000  |
| <b>Equitable care</b>                          |      |      |      |      |      |      |        |
| Spoke in an understandable language            | 92.5 | 7.5  | 0.0  | 92.5 | 7.5  | 0.0  | 1.000  |
| Never disrespected & discriminated the women   | 98.8 | 1.2  | 0.0  | 98.5 | 1.5  | 0.0  | 0.318  |
| <b>Non-abandon care</b>                        |      |      |      |      |      |      |        |
| Encouraged to call if required                 | 96.4 | 3.3  | 0.3  | 92.5 | 7.2  | 0.3  | 0.001  |
| Came quickly when called                       | 67.7 | 32.3 | 0.0  | 64.8 | 35.2 | 0.0  | 0.004  |
| Never left women alone                         | 56.7 | 41.8 | 0.5  | 54.0 | 42.3 | 3.7  | 0.001  |

291 <sup>a</sup> unless medically indicated

## 292 **Factors associated with respectful maternity care practice**

293 Table 5 presents the results of the multilevel mixed-effect linear regression analysis  
294 with a random intercept at the health facility level, for factors associated with  
295 respectful maternity care practice by the healthcare providers. The results are  
296 presented in two models: respectful maternity care practice before the COVID-19  
297 pandemic and during the pandemic. There are also two null models accompanying  
298 each of these full models. Education and total years of experience were excluded from  
299 the final model, as they were found to be collinear with occupation and total years of  
300 experience, respectively (34).

301 The healthcare providers' characteristics were considered as level 1 variable,  
302 and health facility characteristics were considered as level 2 variable. The health  
303 facilities in the null model explained 34.0% variance for the respectful maternity care  
304 practice before the COVID-19 pandemic. After controlling for exposure variables, 26%  
305 of the variation was explained by the health facilities. The null model explained 40%  
306 variance of practice among the health facilities, during the COVID-19 pandemic. After  
307 controlling the exposure variables, it was 33.0%.

308 Age of the healthcare providers was positively associated with respectful  
309 maternity care practice before (Coef. 0.08; 95% CI 0.02 to 0.14) and during (Coef. 0.07;  
310 95% CI -0.002 to 0.14) the COVID-19 pandemic. Being tested positive for COVID-19 in

311 the past was negatively associated with respectful maternity care practice during the  
 312 COVID-19 pandemic (Coef. -3.18; 95% CI -5.06 to -1.30). The client-provider ratio per  
 313 day was negatively associated with respectful maternity care practice before (Coef. -  
 314 5.16; 95% CI -8.41 to -1.91) and during (Coef. -7.47; 95% CI -12.72 to -2.23) the COVID-  
 315 19 pandemic.

316

317 **Table 5. Multilevel mixed-effects linear regression analysis for respectful maternity**  
 318 **care practice among the healthcare providers**

| Predictors                                                | Respectful Maternity Care Practice |                       |                |                              |                        |         |
|-----------------------------------------------------------|------------------------------------|-----------------------|----------------|------------------------------|------------------------|---------|
|                                                           | Before the COVID-19 pandemic       |                       | P-value        | During the COVID-19 pandemic |                        | p-value |
|                                                           | Null model                         | Final Model (n=267)   |                | Null model                   | Final Model (n=267)    |         |
|                                                           |                                    | Estimates (CI)        | Estimates (CI) |                              |                        |         |
| <b>Healthcare provider characteristics (Fixed effect)</b> |                                    |                       |                |                              |                        |         |
| <b>The subjective measure of workload</b>                 |                                    | 0.02 (-0.02 to 0.05)  | 0.376          |                              | 0.02 (-0.02 to 0.06)   | 0.246   |
| <b>Experience at the present birthing center</b>          |                                    | -0.04 (-0.15 to 0.07) | 0.450          |                              | -0.02 (-0.14 to 0.11)  | 0.784   |
| <b>Occupation</b>                                         |                                    |                       |                |                              |                        |         |
| Auxiliary Nurse Midwife                                   |                                    | Reference             |                |                              | Reference              |         |
| Staff Nurse                                               |                                    | -0.12 (-1.62 to 1.39) | 0.879          |                              | -0.004 (-1.68 to 1.69) | 0.996   |
| <b>Age</b>                                                |                                    | 0.08 (0.02 to 0.14)   | 0.011          |                              | 0.07 (0.002 to 0.14)   | 0.037   |
| <b>Ever heard/read about RMC</b>                          |                                    |                       |                |                              |                        |         |

|                                                     |                |                        |       |                |                         |       |
|-----------------------------------------------------|----------------|------------------------|-------|----------------|-------------------------|-------|
| No                                                  |                | Reference              |       |                | Reference               |       |
| Yes                                                 |                | 0.68 (-0.37 to 1.73)   | 0.203 |                | 1.38 (0.17 to 2.59)     | 0.055 |
| <b>Skilled Birth Attendant training</b>             |                |                        |       |                |                         |       |
| No                                                  |                | Reference              |       |                | Reference               |       |
| Yes                                                 |                | -0.20 (-1.15 to 0.75)  | 0.684 |                | -0.36 (-1.43 to 0.71)   | 0.513 |
| <b>COVID-19 test (PCR test) in past</b>             |                |                        |       |                |                         |       |
| Negative/ Not tested                                |                | -                      |       |                | Reference               |       |
| Positive                                            |                | -                      |       |                | -3.18 (-5.06 to -1.30)  | 0.001 |
| <b>Number of deliveries attended last month</b>     |                | -0.02 (-0.04 to 0.01)  | 0.129 |                | -0.02 (-0.04 to 0.01)   | 0.236 |
| <b>Health facility level characteristics (n=78)</b> |                |                        |       |                |                         |       |
| <b>Client-provider ratio per day</b>                |                |                        |       |                |                         |       |
| Before the COVID-19 pandemic*                       |                | -5.16 (-8.41 to -1.91) | 0.002 |                |                         |       |
| During the COVID-19 pandemic                        |                |                        |       |                | -7.47 (-12.72 to -2.23) | 0.005 |
| <b>Level of health facility</b>                     |                |                        |       |                |                         |       |
| Health Post                                         |                | 0.48 (-1.39 to 2.36)   | 0.614 |                | -0.12 (-2.41 to 2.18)   | 0.921 |
| Primary Health Care Center                          |                | -0.55 (-2.69 to 1.58)  | 0.611 |                | -1.93 (-4.57 to 0.71)   | 0.151 |
| Hospital (City + District)                          |                | Reference              |       |                | Reference               |       |
| <b>Random effect</b>                                |                |                        |       |                |                         |       |
| <b>Health facility level variance (SD)</b>          | 5.04<br>(2.24) | 3.25 (1.80)            |       | 8.36<br>(2.89) | 5.60 (2.36)             |       |
| <b>ICC (%)</b>                                      | 34.0           | 26.0                   |       | 40.0           | 33.0                    |       |

319 CI: Confidence Interval, SD: Standard Deviation, ICC: Intraclass Correlation Coefficient, Before the COVID-19 pandemic: July/August

320 2019 to January/February 2020, During the COVID-19 pandemic: February/March 2020 to June/July 2020.

321

## 322 **Discussions**

323

### 324 **Principal findings**

325 This study investigated the association between workload and practice of respectful  
326 maternity care among the healthcare providers in South Western Nepal, before and  
327 during the COVID-19 pandemic. While the workload among the healthcare providers was  
328 negatively associated with respectful maternity care practice, both before and during the  
329 pandemic, the effect of workload on the practice of respectful maternity care was larger  
330 during the pandemic.

331 Higher workload among the healthcare providers was negatively associated with  
332 respectful maternity care practice. However, the coefficient was larger during the  
333 pandemic (Coef. -7.47; 95% CI -12.72 to -2.22) than before (Coef. -5.16; 95% CI -8.41 to -  
334 1.91). In a high workload setting, healthcare providers often ignore the procedures that  
335 do not immediately impact the mother and baby's life (35,36). These high workload  
336 settings are often located in urban areas, where the COVID-19 cases are high (5,36). Since  
337 healthcare providers want to prevent themselves from acquiring COVID-19 infection, they  
338 avoid respectful maternity care practices such as client communication and labor  
339 companionship (5). As a result the effect of workload on respectful maternity care  
340 practice might have been greater during the pandemic in this study. A study from Nepal  
341 also found decrease in labor companionship during the pandemic (19). Therefore,

342 decrement of workload among the healthcare providers should be considered more  
343 during the pandemic.

344           The variance among each health facility for respectful maternity care practice  
345 increased more during the pandemic. The difference in client-provider ratio found among  
346 the health facilities from this study, could be a possible reason for the variance of  
347 respectful maternity care across the health facilities. It was also found from the national  
348 data that the decline in delivery cases varied across the type of health facility in Nepal  
349 (28). While 50% or more of local health facilities were closed during the early lockdown  
350 period for child delivery, almost all tertiary healthcare centers were open (28).  
351 Strengthening the quality of local health facilities can increase child delivery cases there,  
352 which will help distribute client-provider ratio among health facilities (37). As a result,  
353 respectful maternity care can be practiced, even during the pandemic.

354           Increased age among the healthcare providers was positively associated with the  
355 respectful maternity care practice. A possible explanation could be, with age healthcare  
356 providers become more experienced with maternity care. They become more skillful in  
357 satisfying women's need, and respecting her desires (10).

358           Healthcare providers who were tested positive for COVID-19 had lower respectful  
359 maternity care practice scores. Healthcare providers are praised for their work during the  
360 COVID-19 pandemic. However, they are still stigmatized by community for being the  
361 source of infection (38,39). To avoid being stigmatized, they might have avoided  
362 respectful maternity care practices such as client interaction and communication (39,40).

363 Also, other possible reasons could be decreased mental and physical performance due to  
364 stigma, psychological distress, and diseases (41,42). Therefore, more physical and mental  
365 health support to the healthcare providers should be provided to improve their  
366 performance (43).

367

## 368 **Strengths and weaknesses**

369 This study has several strengths. It is one of the first on healthcare providers' workload  
370 and its association with respectful maternity care during the COVID-19 pandemic. As this  
371 study included all the health facilities in the study area, it provides an overview of all  
372 levels of health facilities and all the cadre of healthcare providers in Nepal.

373 It also has several limitations. The respectful maternity care practice was affected  
374 by social desirability bias. In order to overcome it, assurance of anonymity and  
375 confidentiality was provided. Also, the healthcare providers were well explained about the  
376 objectives of the study and its possible impact on the scientific literatures. The data  
377 related to respectful maternity care practice before the pandemic depended on the  
378 healthcare provider's memory, which might have introduced a measurement error in the  
379 outcome assessment. Since the COVID-19 pandemic occurred during the data collection,  
380 the researcher had to rely on the self-reporting data for before the pandemic period. The  
381 visual rating of the NASA TXL scale was changed to auditory description, as the data  
382 collection was done through telephone for the prevention of spread of COVID-19  
383 infection. The change of scale from visual to auditory could have caused over-reporting or



384 under-reporting of the workload. This could be the reason why it did not show strong  
385 evidence for the association with the respectful maternity care practice (44).

386

## 387 **Conclusions**

388 While a higher client-provider ratio was associated with a lower respectful maternity care  
389 practice score both before and during the COVID-19 pandemic, the coefficient was larger  
390 during the pandemic. Also, the variance among the health facilities for respectful  
391 maternity care was increased more during the COVID-19 pandemic. The findings of this  
392 study call for the decrement in the client-provider ratio for better respectful maternity  
393 care practice, especially during the pandemic. However, supplying health human  
394 resources per the population demand, especially during the pandemic, may be difficult in  
395 a resource-limited setting. The number of delivery at local health facilities can be  
396 increased by improving the quality of care, particularly during the pandemic. This could  
397 help equal distribution of client-provider and practice respectful maternity care, even  
398 during the pandemic. Further, the healthcare providers who were tested positive for  
399 COVID-19 had lower respectful maternity care practice scores. Therefore, additional  
400 physical and mental health support to the healthcare providers should be considered to  
401 improve their respectful maternity care practice, particularly during the pandemic.

402

## 403 **Acknowledgments**

404

405 The authors would like to express sincere gratitude to all healthcare providers who  
406 participated in this study. We want to thank the District Public Health Office of Rupandehi,  
407 Kapilvastu, Nawalparasi (East and West), and Green Tara Nepal for assisting our research.  
408 We are thankful to all health facilities' administrative departments for supporting and  
409 facilitating our research. We are grateful to Professor Nirmala Pokharel, Ms. Yasoda Giri,  
410 and Ms. Namita Shrestha for their valuable and expert contribution to the questionnaire's  
411 content validity. Special mention of thanks to Ms. Kopila Shrestha and Mr. Kumar Thapa  
412 for helping with the administrative process. We are thankful to Ms. Bandana Rajbanshi  
413 and Ms. Renu Chaudhary for helping with the pre-test of the questionnaire. We are  
414 grateful to Ms. Asmita Jha, Engila Khadka, and Avida Ojha for helping with data collection.  
415 We would also like to thank Ms. Suhyoon Choi for helping with the documentation  
416 process.

417

## 418 **References**

- 419 1. The White Ribbon Alliance for Safe Motherhood. Respectful maternity care: The  
420 universal rights of childbearing women. The White Ribbon Alliance for Safe  
421 Motherhood; 2011.
- 422 World Health Organization. Intrapartum care for a positive childbirth experience.  
423 Geneva: World Health Organization; 2018.

424 Afulani PA, Moyer CA. Accountability for respectful maternity care. *Lancet*. 2019;  
425 394(10210):1692–3.

426 Bohren MA, Vogel JP, Hunter EC, Lutsiv O, Makh SK, Souza JP, et al. The  
427 mistreatment of women during childbirth in health facilities globally: A mixed-  
428 methods systematic review. *PLoS Med*. 2015; 12(6):1–32.

429 Jolivet RR, Warren CE, Sripad P, Ateva E, Gausman J, Mitchell K, et al. Upholding  
430 rights under COVID-19: The respectful maternity care charter. *Health Hum Rights*.  
431 2020; 22(1):391–4.

432 Rocca-Ihenacho L, Alonso C. Where do women birth during a pandemic? Changing  
433 perspectives on safe motherhood during the COVID-19 pandemic. *J Glob Heal Sci*.  
434 2020;2(1):4.

435 Bowser D, Hill K. Exploring evidence for disrespect and abuse in facility-based  
436 childbirth report of a landscape analysis. Boston: Harvard School of Public Health  
437 University Research Co., LLC;2010.

438 Ndwiga C, Warren CE, Ritter J, Sripad P, Abuya T. Exploring provider perspectives on  
439 respectful maternity care in Kenya: “work with what you have.” *Reprod Health*.  
440 2017;14(1):99.

441 Bogren M, Erlandsson K, Akter HA, Khatoon Z, Chakma S, Chakma K, et al. What  
442 prevents midwifery quality care in Bangladesh? A focus group enquiry with  
443 midwifery students. *BMC Health Serv Res*. 2018;18(1):639.

444 Dynes MM, Twentyman E, Kelly L, Maro G, Msuya AA, Dominico S, et al. Patient and  
445 provider determinants for receipt of three dimensions of respectful maternity care  
446 in Kigoma Region, Tanzania-April-July, 2016. *Reprod Health*. 2018;15(1):41The  
447 White Ribbon Alliance. *Respectful maternity care*. Vol. 26. 2016.

448 World Health Organization. *Global strategy on human resources for health:  
449 Workforce 2030*. Geneva: World Health Organization; 2016.

450 Global health workforce alliance. *Country responses* [Internet]. global health  
451 workforce alliances; 2020 [cited 2020 Dec 3]. Available from:  
452 <https://www.who.int/workforcealliance/countries/npl/en/>.

453 Chang LY, Yu HH, Chao YFC. The Relationship Between Nursing Workload, Quality of  
454 Care, and Nursing Payment in Intensive Care Units. *J Nurs Res*. 2019;27(1):1.

455 Ministry of Health, New ERA. *Nepal Demographic Health Survey NDHS 2016 final  
456 report*. Singha Durbar, Nepal: Ministry of Health, New ERA; 2017.

457 Kumar Aryal K, Sharma SK, Nath Khanal M, Bista B, Lal Sharma S, Kafle S, et al.  
458 *Maternal health care in Nepal: trends and determinants*. DHS Further Analysis  
459 Reports No. 118. Rockville, Maryland, USA; 2018.

460 Shah R, Rehfuess EA, Paudel D, Maskey MK, Delius M. Barriers and facilitators to  
461 institutional delivery in rural areas of Chitwan district, Nepal: A qualitative study.  
462 *Reprod Health*. 2018;15(1):110.

463 Roder-Dewan S, Nimako K, Twum-Danso NAY, Amatya A, Langer A, Kruk M. Health  
464 system redesign for maternal and newborn survival: Rethinking care models to  
465 close the global equity gap. *BMJ Global Health*. 2020;5(10):2539.  
466 FHD/NHSSP. Responding to increased demand for institutional childbirths at  
467 referral hospitals in Nepal: situational analysis and emerging options, 2013.  
468 KC A, Gurung R, Kinney M V, Sunny AK, Moinuddin M, Basnet O, et al. Effect of the  
469 COVID-19 pandemic response on intrapartum care, stillbirth, and neonatal  
470 mortality outcomes in Nepal: a prospective observational study. *Lancet Glob  
471 Health*. 2020;8(10):e1273-e1281.  
472 Jolly Y, Aminu M, Mgawadere F, Van Den Broek N. We are the ones who should  
473 make the decision - knowledge and understanding of the rights-based approach to  
474 maternity care among women and healthcare providers. *BMC Pregnancy Childbirth*.  
475 2019;19(1) 42.  
476 Onta S, Choulagai B, Shrestha B, Subedi N, Bhandari GP, Krettek A. Perceptions of  
477 users and providers on barriers to utilizing skilled birth care in mid- and far-western  
478 Nepal: a qualitative study. *Glob Health Action*. 2014;7(1):24580. Dec 2];7(1):24580.  
479 Asefa A, Bekele D, Morgan A, Kermode M. Service providers' experiences of  
480 disrespectful and abusive behavior towards women during facility based childbirth  
481 in Addis Ababa, Ethiopia. *Reprod Health*. 2018;15(1):4.  
482 Hart SG, Staveland LE. Development of NASA-TLX (Task Load Index): Results of  
483 empirical and theoretical research. *Advances in Psychology*. 1988;52(C):139–83.

484 Human Performance Research Group, NASA Ames Research Center. TASK LOAD  
485 INDEX (NASA-TLX) v 1.0. Moffett Field. California: NASA Ames Research Center.  
486 Hoonakker P, Carayon P, Gurses AP, Brown R, Khunlertkit A, McGuire K, et al.  
487 Measuring workload of ICU nurses with a questionnaire survey: the NASA Task Load  
488 Index (TLX). IIE Trans Healthc Syst Eng. 2011;1(2):131–43.  
489 Okonofua F, Ntoimo L, Ogu R, Galadanci H, Abdus-Salam R, Gana M, et al.  
490 Association of the client-provider ratio with the risk of maternal mortality in  
491 referral hospitals: A multi-site study in Nigeria. Reprod Health. 2018;15(1):1–9.  
492 World Health Organization. WHO Director-General’s opening remarks at the media  
493 briefing on COVID-19 - 11 March 2020 [Internet]. Geneva: World Health  
494 Organization; 2020 [cited 2021 Jan 4]. Available from:  
495 [https://www.who.int/director-general/speeches/detail/who-director-general-s-](https://www.who.int/director-general/speeches/detail/who-director-general-s-opening-remarks-at-the-media-briefing-on-covid-19---11-march-2020)  
496 [opening-remarks-at-the-media-briefing-on-covid-19---11-march-2020](https://www.who.int/director-general/speeches/detail/who-director-general-s-opening-remarks-at-the-media-briefing-on-covid-19---11-march-2020)  
497 Government of Nepal, Ministry of Health and Population, Department of Health  
498 Service, Management Division, Integrated Health Information Management  
499 Section. Assess impact of COVID-19 pandemic in selected health services with  
500 estimation of ‘ excess maternal deaths. Kathmandu, Nepal: Ministry of Health,  
501 Government of Nepal, Ministry of Health and Population, Department of Health  
502 Service, Management Division, Integrated Health Information Management  
503 Section; 2021.

504 USAID, MCHIP. Respectful maternity care standards. Washington DC, United States:  
505 MCHIP, USAID. 2019.

506 Government of Nepal, Ministry of Health and Population. Safe Motherhood  
507 Programme. [Internet]. Government of Nepal, Ministry of Health and Population;  
508 2020 [cited 2020 Dec 4]. Available from:  
509 [https://www.mo hp.gov.np/eng/program/reproductive-maternal-health/safe-  
510 motherhood-programme](https://www.mo hp.gov.np/eng/program/reproductive-maternal-health/safe-<br/>510 motherhood-programme).

511 Friese MA, White S V., Byers JF. Chapter 34. Handoffs: Implications for Nurses.  
512 Patient Safety and Quality: An evidence-based handbook for nurses. Rockville (MD):  
513 Agency for healthcare research and quality (US); 2008. Chapter 34.

514 Gebeyehu S, Zeleke B. Workplace stress and associated factors among healthcare  
515 professionals working in public health care facilities in Bahir Dar City, Northwest  
516 Ethiopia, 2017. BMC Res Notes. 2019; 12(1): 1–5.

517 Streiner DL, Norman GR. Health Measurement Scales: A practical guide to their  
518 development and use. Health Measurement Scales: A Practical guide to their  
519 development and use. Fourth edition. Newyork: Oxford University Press; 2008.

520 Dormann CF, Elith J, Bacher S, Buchmann C, Carl G, Carré G, et al. Collinearity: a  
521 review of methods to deal with it and a simulation study evaluating their  
522 performance. Ecography (Cop). 2013 Jan; 36(1):27–46.

523 Reader TW, Gillespie A. Patient neglect in healthcare institutions: A systematic  
524 review and conceptual model. BMC Health Serv Res. 2013;13:156.

525 Kafle K, Shrestha DB, Baniya A, Lamichhane S, Shahi M, Gurung B, et al.  
526 Psychological distress among health service providers during COVID-19 pandemic in  
527 Nepal. PLoS One. 2021;16(2):e0246784.

528 Kimani RW, Maina R, Shumba C, Shaibu S. Maternal and newborn care during the  
529 COVID-19 pandemic in Kenya: Re-contextualising the community midwifery model.  
530 Hum Resour Health. 2020;18(1):75.

531 Taylor S, Landry CA, Rachor GS, Paluszek MM, Asmundson GJG. Fear and avoidance  
532 of healthcare workers: An important, under-recognized form of stigmatization  
533 during the COVID-19 pandemic. J Anxiety Disord. 2020;75:102289.

534 Khanal P, Devkota N, Dahal M, Paudel K, Joshi D. Mental health impacts among  
535 health workers during COVID-19 in a low resource setting: a cross-sectional survey  
536 from Nepal. Global Health. 2020; 16(1):89.

537 Razu SR, Yasmin T, Arif TB, Islam MS, Islam SMS, Gesesew HA, et al. Challenges  
538 Faced by Healthcare Professionals During the COVID-19 Pandemic: A Qualitative  
539 Inquiry From Bangladesh. Front Public Heal. 2021; 9:1024.

540 Suvvari TK, Kutikuppala LVS, Tsagkaris C, Corriero AC, Kandi V. Post-COVID-19  
541 complications: Multisystemic approach. Journal of Medical Virology. 2021;  
542 93(12):6451–5.

543 Ramaci T, Barattucci M, Ledda C, Rapisarda V. Social Stigma during COVID-19 and its  
544 Impact on HCWs Outcomes. *Sustainability*. 2020 ;12(9):3834.



545 Liu Q, Luo D, Haase JE, Guo Q, Wang XQ, Liu S, et al. The experiences of health-care  
546 providers during the COVID-19 crisis in China: a qualitative study. *Lancet Glob*  
547 *Health*. 2020;8(6):e790–8.

548 Block ES, Erskine L. Interviewing by telephone: Specific considerations,  
549 opportunities, and challenges. *Int J Qual Methods*. 2012;11(4):428–45.

550

551

552
